# Supplementary material
Source: MDPI journal article supplement (https://www.mdpi.com/2071-1050/14/6/3144)
Supplement: s1 [file s1]

Table S1. The functional enzymes related to macromolecular metabolism.

| EC number | Level1          | Level2                                           | Level3                                                     | Name                                             |
|-----------|-----------------|--------------------------------------------------|------------------------------------------------------------|--------------------------------------------------|
| 3.2.1.4   | Hydrolases      | Glycosylases                                     | Glycosidases                                               | cellulase                                        |
| 3.2.1.8   | Hydrolases      | Glycosylases                                     | Glycosidases                                               | endo-1,4-beta-xylanase                           |
| 3.4.21.53 | Hydrolases      | Acting on peptide bonds (peptidases)             | Serine endopeptidases                                      | endopeptidase La                                 |
| 3.4.21.92 | Hydrolases      | Acting on peptide bonds (peptidases)             | Serine endopeptidases                                      | endopeptidase Clp                                |
| 4.2.1.1   | Lyases          | Carbon-oxygen lyases                             | Hydro-lyases                                               | carbonic anhydrase                               |
| 5.3.1.5   | Isomerases      | Intramolecular oxidoreductases                   | Interconverting aldoses and ketoses, and related compounds | xylose isomerase                                 |
| 1.1.1.35  | Oxidoreductases | Acting on the CH-OH group of donors              | With NAD <sup>+</sup> or NADP <sup>+</sup> as acceptor     | 3-hydroxyacyl-CoA dehydrogenase                  |
| 1.3.8.1   | Oxidoreductases | Acting on the CH-CH group of donors              | With a flavin as acceptor                                  | short-chain acyl-CoA dehydrogenase               |
| 1.4.4.2   | Oxidoreductases | Acting on the CH-NH <sub>2</sub> group of donors | With a disulfide as acceptor                               | glycine dehydrogenase (aminomethyl-transferring) |
| 2.1.2.10  | Transferases    | Transferring one-carbon groups                   | Hydroxymethyl-, formyl- and related transferases           | aminomethyltransferase                           |

Table S2. The relative abundance of functional genes and enzymes related to the nitrogen cycle or macromolecular metabolism in different sites.

| Functional Genes and Enzymes | A       |      | B       |      | C       |      | D       |      |
|------------------------------|---------|------|---------|------|---------|------|---------|------|
|                              | AVG     | CV   | AVG     | CV   | AVG     | CV   | AVG     | CV   |
| hao                          | 0.0000% | 1.73 | 0.0000% | 0.79 | 0.0000% | 1.73 | 0.0001% | 0.36 |
| nos                          | 0.0004% | 0.54 | 0.00%   | 0.84 | 0.0006% | 0.63 | 0.0016% | 0.37 |
| nar                          | 0.0046% | 0.29 | 0.02%   | 0.69 | 0.0048% | 0.42 | 0.0272% | 0.46 |
| nir                          | 0.0401% | 0.86 | 0.03%   | 0.5  | 0.0329% | 0.65 | 0.0532% | 0.16 |
| nor                          | 0.0013% | 0.45 | 0.01%   | 0.8  | 0.0017% | 0.49 | 0.0088% | 0.47 |
| EC 3.2.1.4                   | 0.0742% | 0.42 | 0.0684% | 0.39 | 0.1218% | 0.76 | 0.0919% | 0.14 |
| EC 3.2.1.8                   | 0.0373% | 0.46 | 0.0355% | 0.51 | 0.0675% | 0.86 | 0.0497% | 0.18 |
| EC 4.2.1.11                  | 0.0576% | 0.13 | 0.0487% | 0.07 | 0.0543% | 0.09 | 0.0518% | 0.02 |
| EC 5.3.1.5                   | 0.0476% | 0.62 | 0.0315% | 0.35 | 0.0496% | 0.48 | 0.0530% | 0.31 |
| EC 3.4.21.53                 | 0.0179% | 0.59 | 0.0078% | 0.23 | 0.0171% | 0.91 | 0.0152% | 0.63 |
| EC 1.4.4.2                   | 0.1055% | 0.23 | 0.1008% | 0.12 | 0.1299% | 0.46 | 0.0947% | 0.04 |
| EC 2.1.2.10                  | 0.0332% | 0.39 | 0.0325% | 0.10 | 0.0385% | 0.17 | 0.0356% | 0.12 |
| EC 1.1.1.35                  | 0.0039% | 0.77 | 0.0167% | 0.20 | 0.0063% | 1.22 | 0.0092% | 0.77 |
| EC 1.3.8.1                   | 0.0236% | 0.82 | 0.0475% | 0.27 | 0.0128% | 0.84 | 0.0266% | 0.72 |

AVG is the abbreviation of average and CV is the abbreviation of coefficient of variation. Group A includes samples A1, A2, A3, and A4; Group B includes samples B1, B2, B3, and B4; Group C includes samples C1, C2, C3, and C4; Group D includes samples D1, D2, D3, and D4.
